# Supplementary material
Source: PubMed Central journal article supplement (PMC3233070)
Supplement: supp_77.23.8350_AEM-AEM05581-11-s01.pdf [file supp_77.23.8350_AEM-AEM05581-11-s01.pdf]

```

glu1      FPSYTTIVIS EFALTN-----GG--NQVAFFESAFPFLDGLSYVLLYFPFVATSP-----
schco    FPNYKVVIS EFALANPS-----GGQTAQVNFVKQAFWLDSQSWVELYFPFVATSP-----
LACBI    YPQYPIWIT EYASTS-----TDSSVVADFLNQTITYMDTLDWIERYSWFGYF-----
COPCI    FPEYPIWIT EYADIS-----SNDAEVYVFNMASIHYLDELEWVERYAWFGFRPEPDVH
PENMQ    YPNTSIWIT EYALAH-----ADLKDTQAFQTSAEYFDRLDYVERYSYFGSFRSSISNV
NEOFI    Y-HLPIWIT EFAASG-----SEAEQIQFLQAVLPWLDAQPYVERYAYFGVFPG-----
BOTFB    GGNRPLWIT EFQASG-----STDEQNAFMKEVLPWLDASTMVDRYAWFMADTAAG---
MAIZE    CGGKPIWLT EFAPTG-----SDEAIASWLKDAIPQLEDLSYLDAYSYFKVETG-----
SCHPO    G--LPIWLT EFACTNWDDSNLPSLDEVKTLMTSALGFLDGHGSVERYSWFAPATELG---
          :  ::*:          .          :          ::          : * *

glu1      -ALLQAND-----PGAVTTVGTGSCLYTNAGGPSSVGNLMY-----
schco    -ALLQAND-----GGAVTNVGTGSCLYTNAGGPSSVGNLMY-----
LACBI    YNMLRADGGLNALGELYIGAETVHTHVIDPFAGYKTFDGADYAGQPIITTFPALYGAHC
COPCI    GPNATMLTQ-----NQQLTDIGSWYLGGAATGNAPNSSSSSSPTSSGTVGVY
PENMQ    -----FLVNEGGDGLSQLGQVYATYSG-----
NEOFI    -----GLMSSTSALSTLGNFKTA-----
BOTFB    -----MLMTSETELSSYGSVYASA-----
MAIZE    -----AGVGNNNALISSGGLSEVGEIYIS-----
SCHPO    -----AGVGNNNALISSGGLSEVGEIYIS-----

glu1      -----
schco    LSRPHEATSSVYRADIP -----
LACBI    -----
COPCI    RRAVFGQGGLTLLAVLVITL SGLAGVFGMLW
PENMQ    KVDSYQAMLQALVVFLVILAFV -----
NEOFI    -----
BOTFB    -----
MAIZE    -----
SCHPO    -----

```

Fig. S1 Alignment of proteins that had similarity to GLU1.

glu1: *Lentinula edodes*  
schco: *Schizophyllum commune*  
LACBI: *Laccaria bicolor*  
COPCI: *Coprinopsis cinerea*  
PENMQ: *Penicillium marneffeii*  
NEOFI: *Neosartorya fischeri*  
BOTFB: *Botryotinia fuckeliana*  
MAIZE: *Zea mays*  
SCHPO: *Schizosaccharomyces pombe*

Underline indicates signal peptide of GLU1  
Red type indicates N-terminal amino acid sequence of GLU1  
Yellow maker indicates conserved domain among these putative glucanases
